# Supplementary material for: Facile synthesis of indole heterocyclic compounds based micellar nano anti-cancer drugs
Source: Royal Society of Chemistry journal article supplement (doi:10.1039/c8ra07060a), 2018-01-01
Supplement: c8ra07060a1.pdf [file c8ra07060a1.pdf]

## **Facile synthesis of indole heterocyclic compounds based micellar nano anti-cancer drugs**

**\*Imran Ali<sup>1,2</sup> Sofi Danish Mukhtar<sup>1</sup> and Ming Fa Hsieh<sup>3</sup>, Zeid A. Alothman<sup>4</sup>,  
Abdulrahman Alwarthan<sup>4</sup>**

**<sup>1</sup>Department of Chemistry, Jamia Millia Islamia (Central University), New Delhi-110025, India**

**<sup>2</sup>Department of Chemistry, College of Sciences, Taibah University, Al-Medina Al-Munawara – 41477, Saudi Arabia**

**<sup>3</sup>Department of Biomedical Engineering, Chung Yuan Christian University, 200, Chung Pei Rd., Chung Li, Taiwan**

**<sup>4</sup>Department of Chemistry, College of Science, King Saud University, Riyadh 11451, Kingdom of Saudi Arabia**

**\*Correspondence:** [drimran.chiral@gmail.com](mailto:drimran.chiral@gmail.com), [drimran\\_ali@yahoo.com](mailto:drimran_ali@yahoo.com)

## DNA DOCKING STUDIES

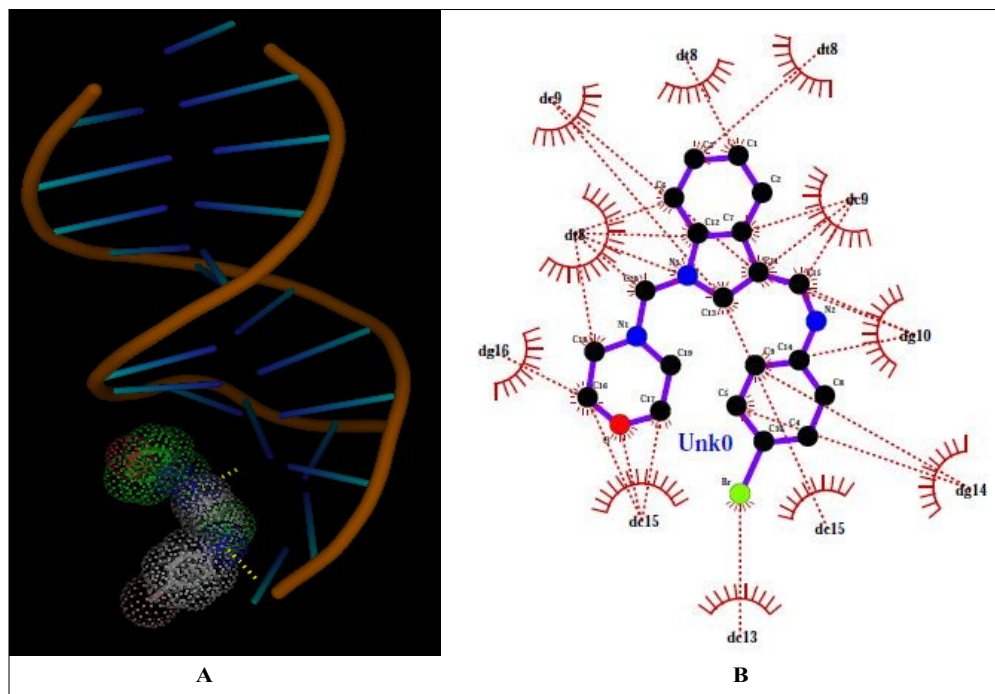

Compound 12

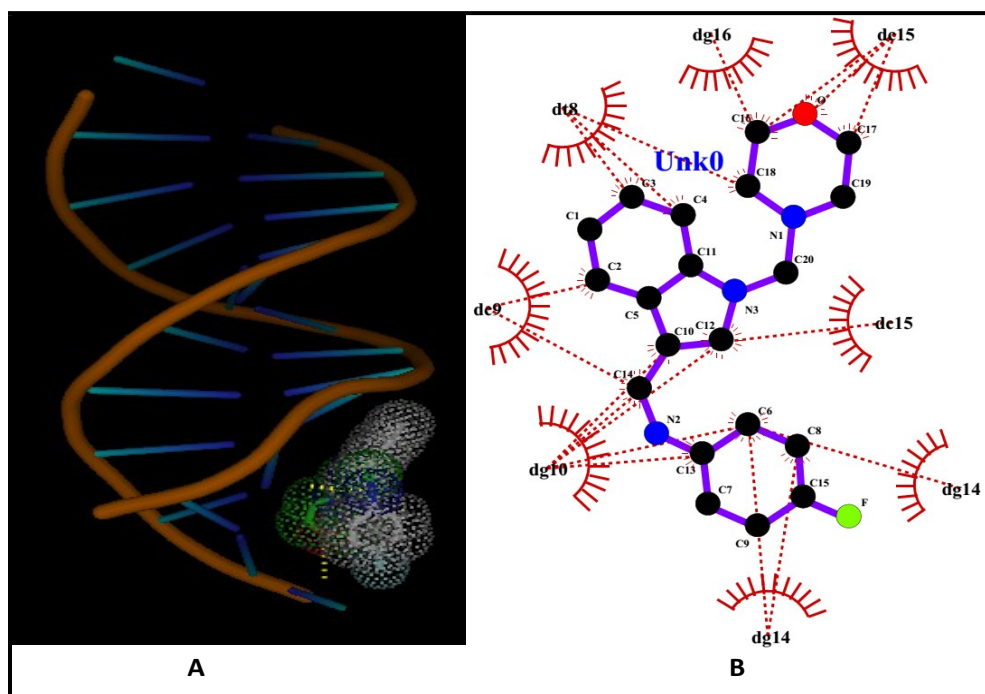

Compound 13

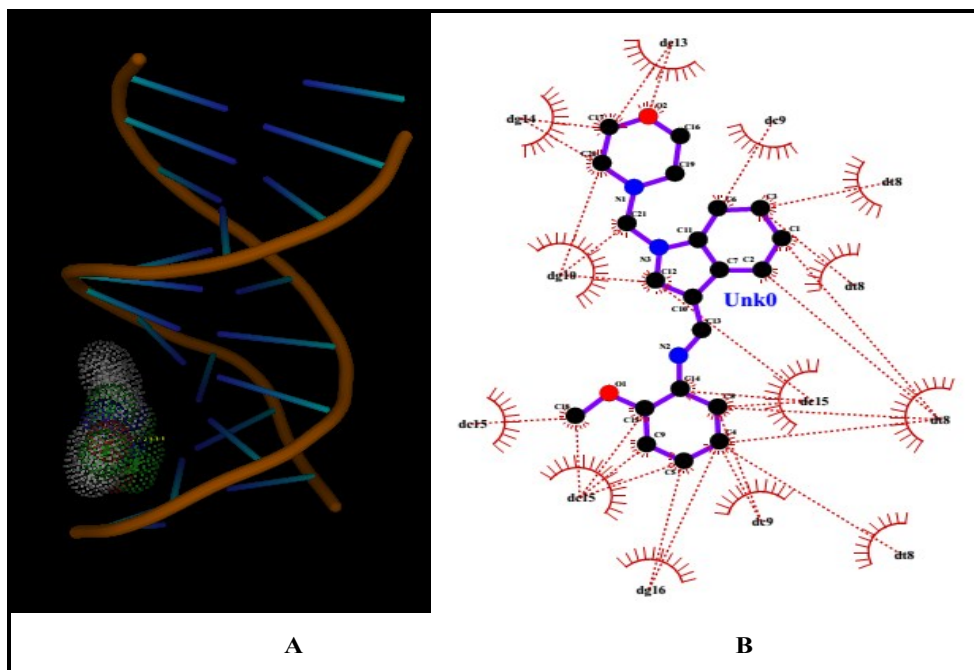

Compound 14

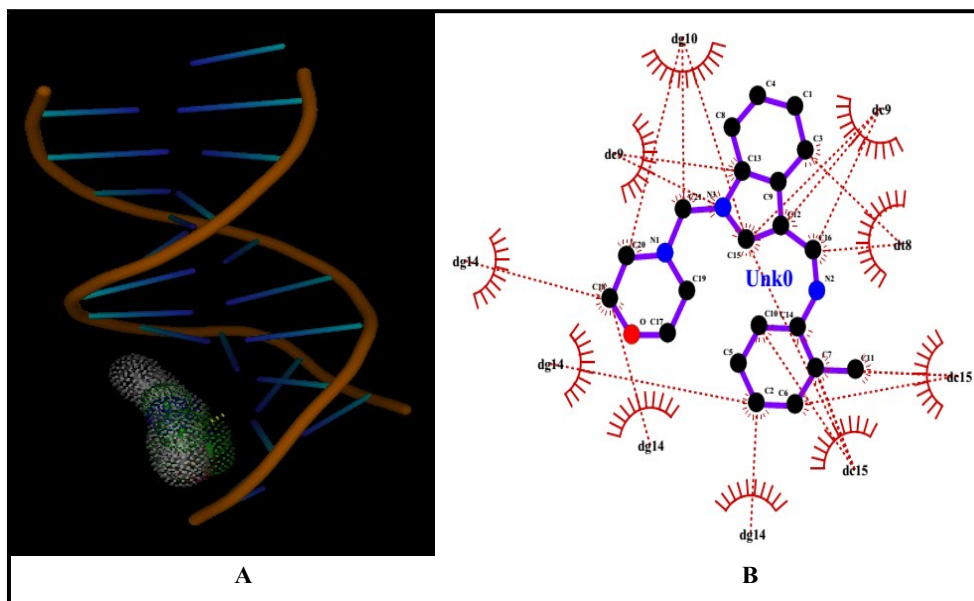

Compound 15

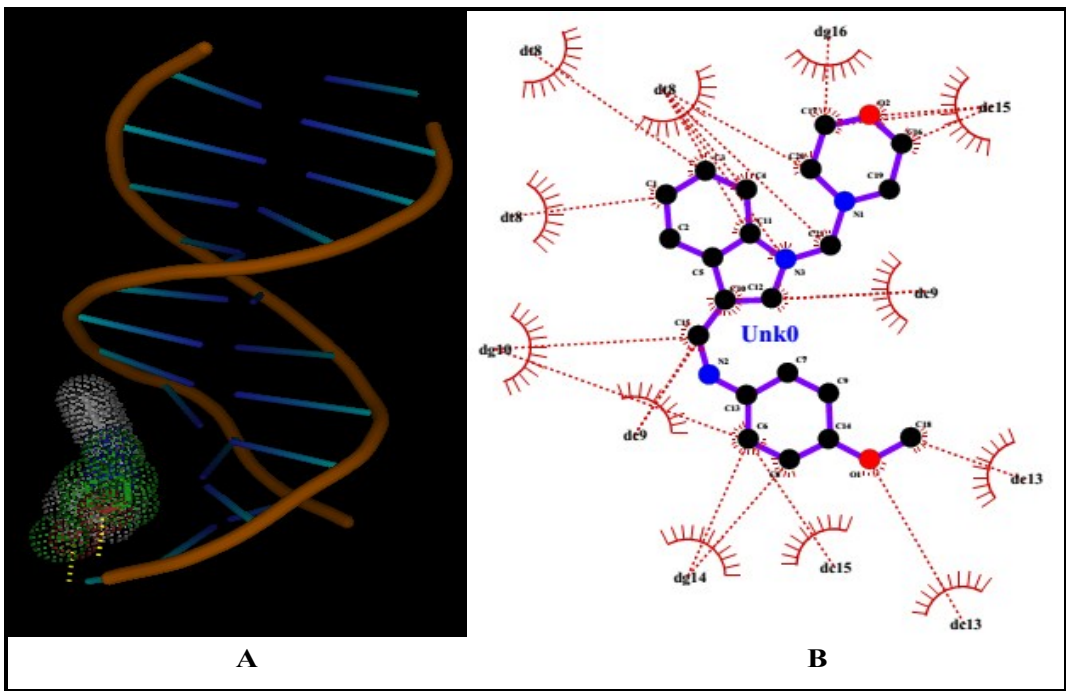

Compound 16

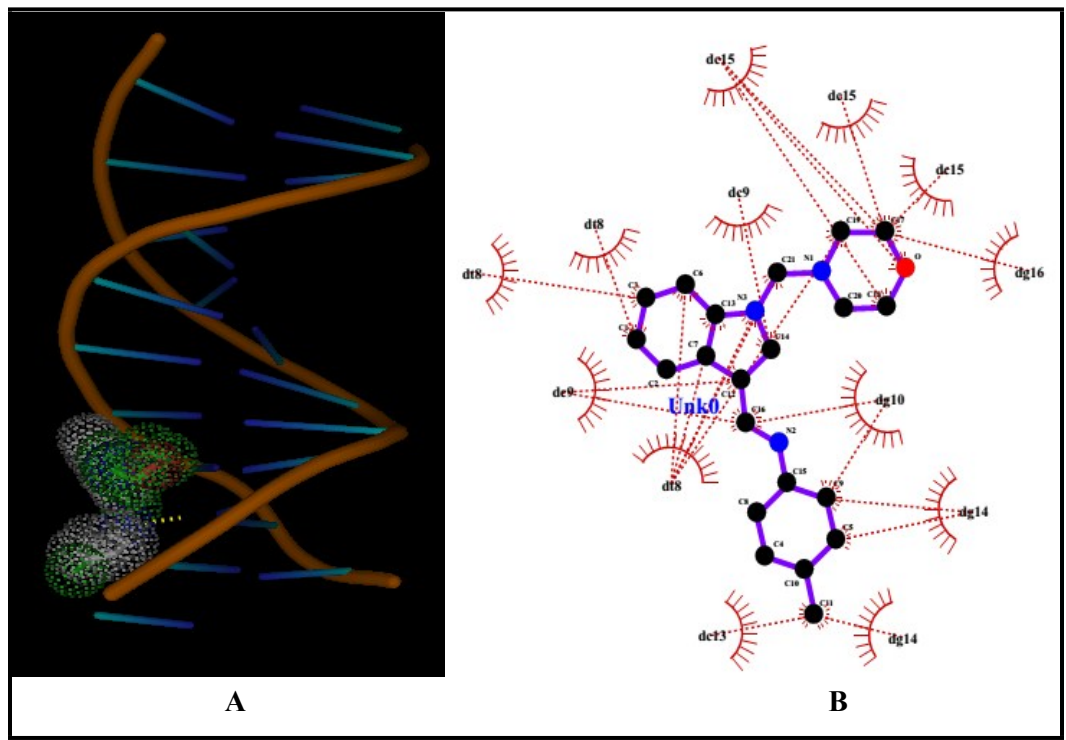

Compound 17

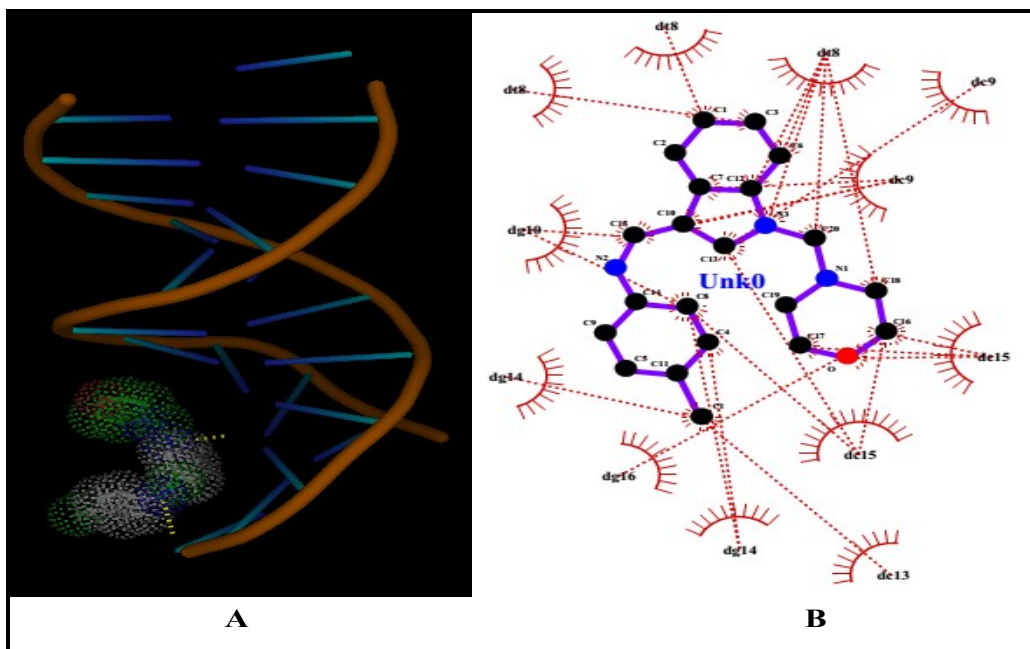

Compound 18

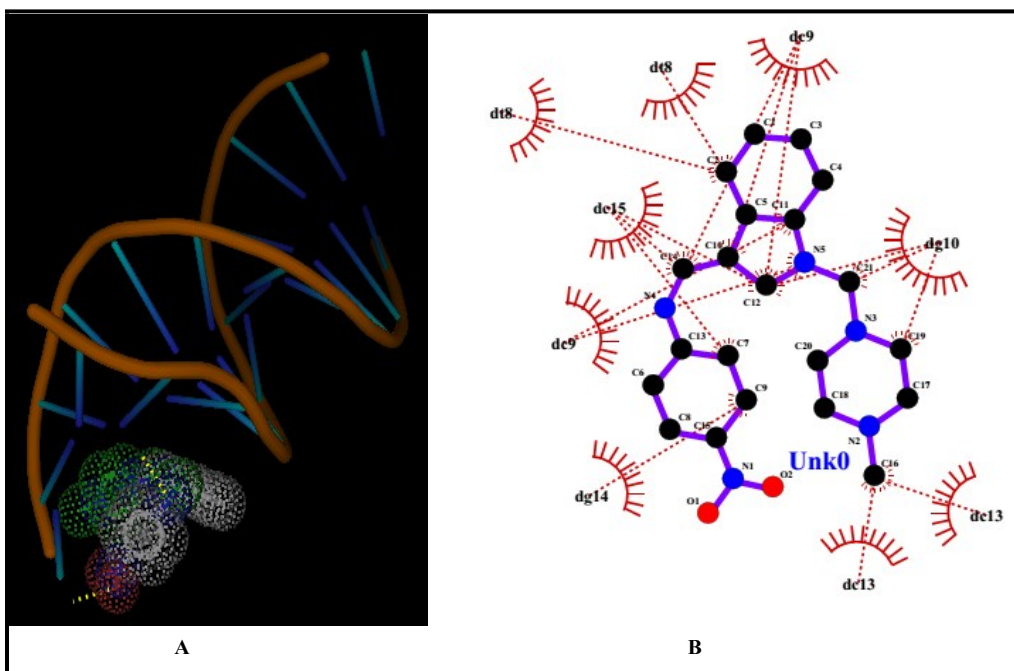

Compound 19

Fig. 2. Docking poses of 12,13,14, 15, 16, 17, 18, 19 with DNA (a) 3D-pose depicting vicinity and hydrogen bonding and (b) 2D-pose showing residues involved in hydrophobic interactions.



## DNA Binding graph of compounds 12, 13,14, 15, 16, 17, 18, 19, 20 and 22

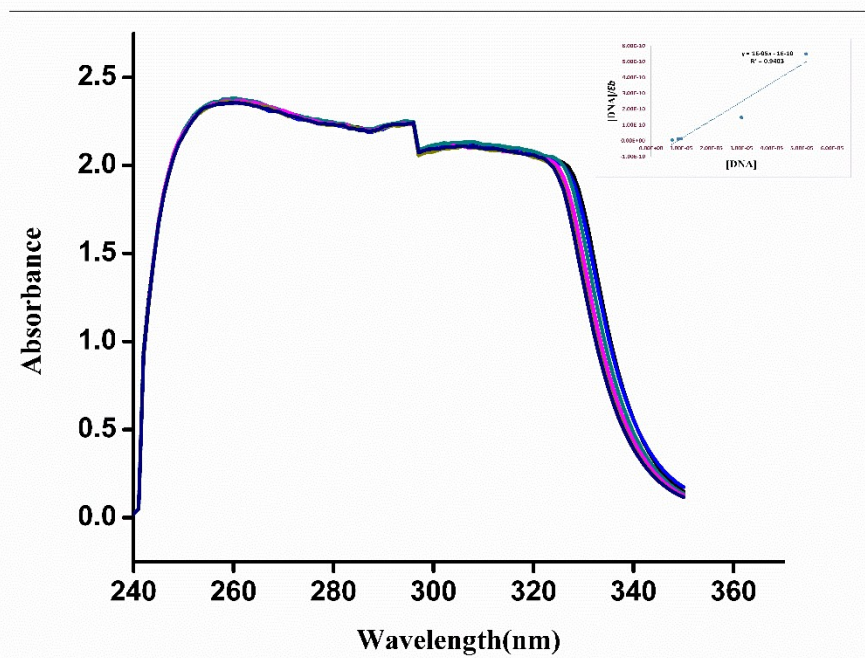

Compound 12

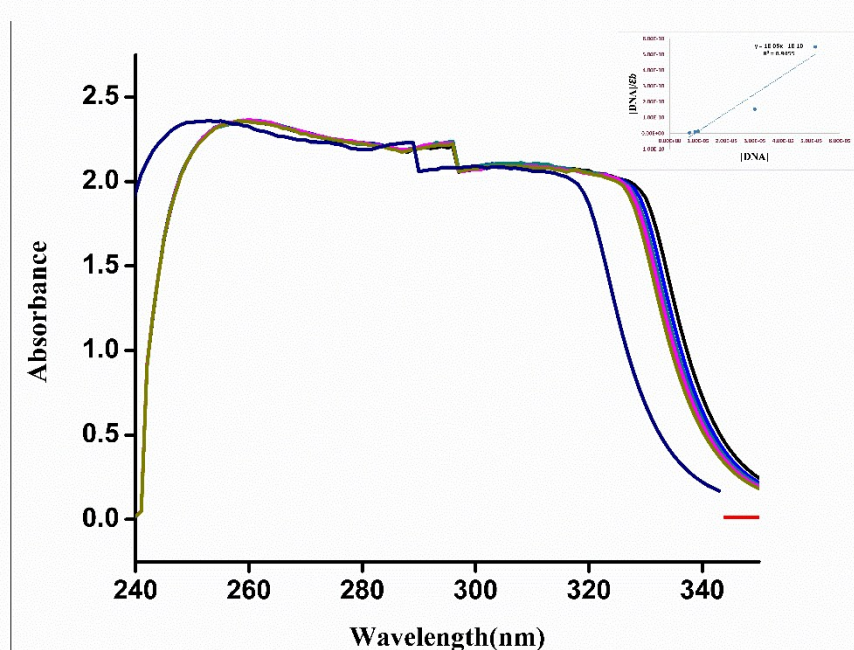

Compound 13

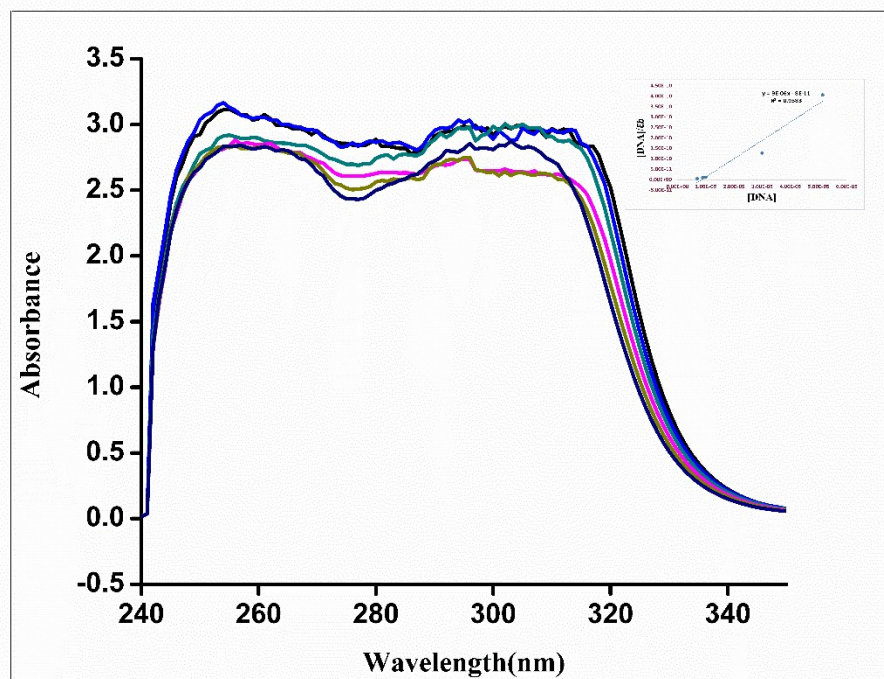

Compound 14

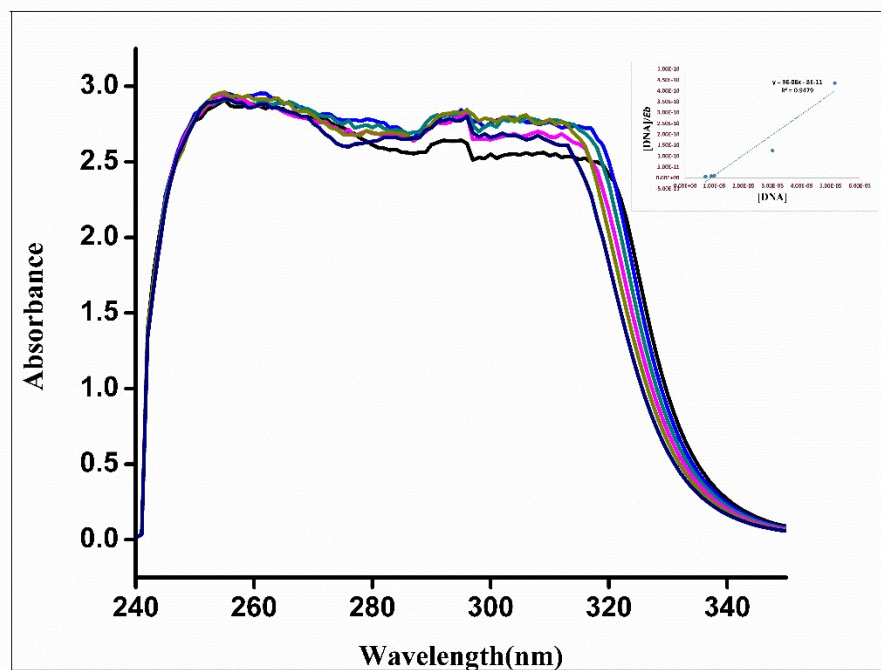

Compound 15

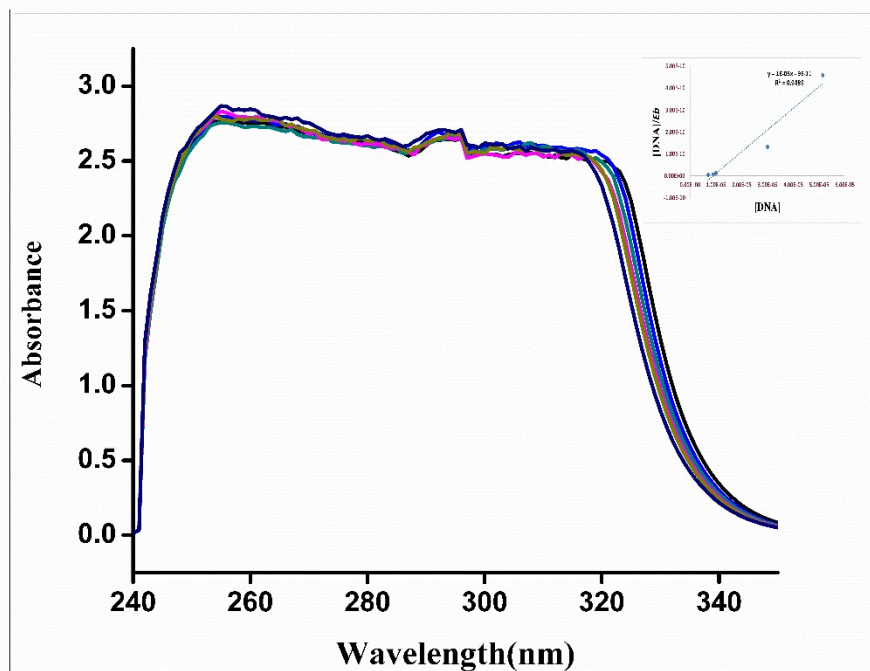

Compound 16

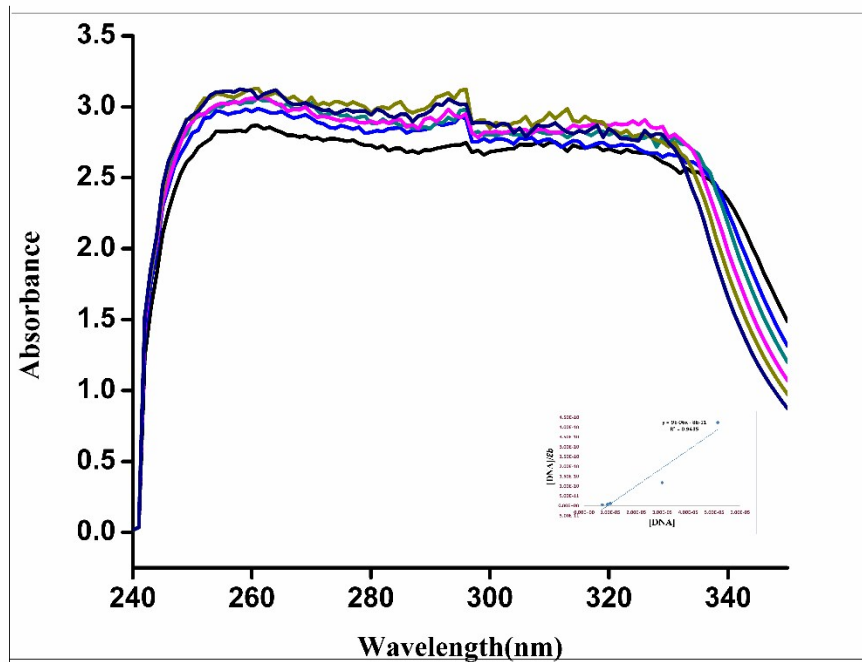

Compound 17



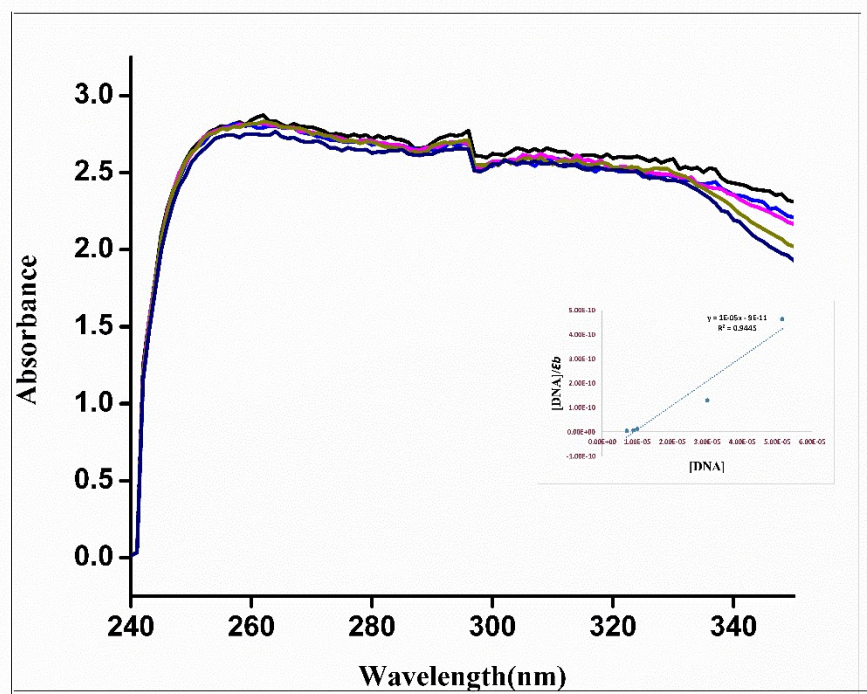

Compound 18

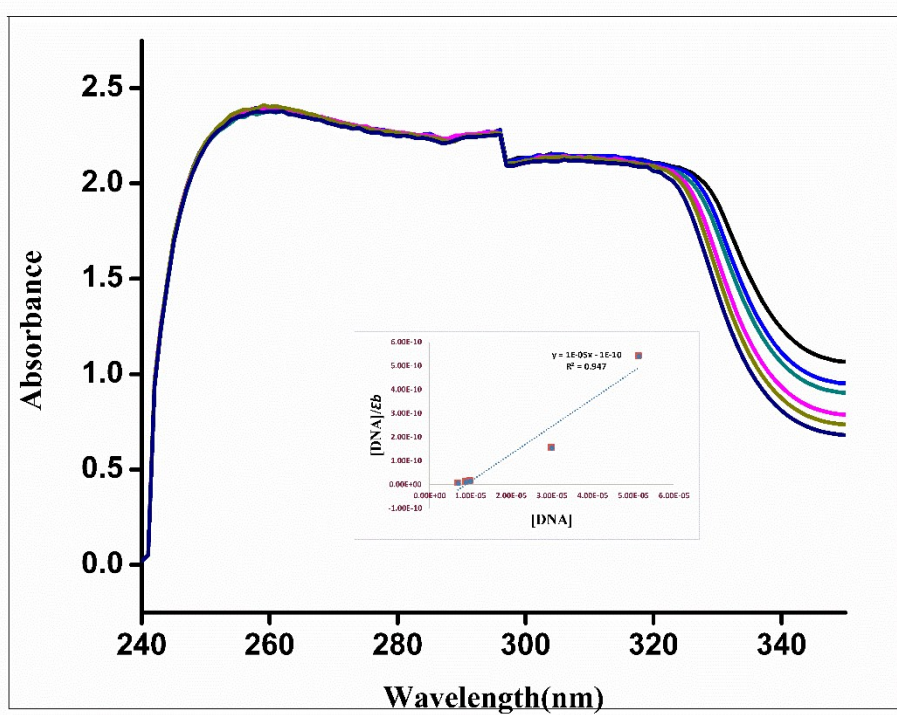

Compound 19

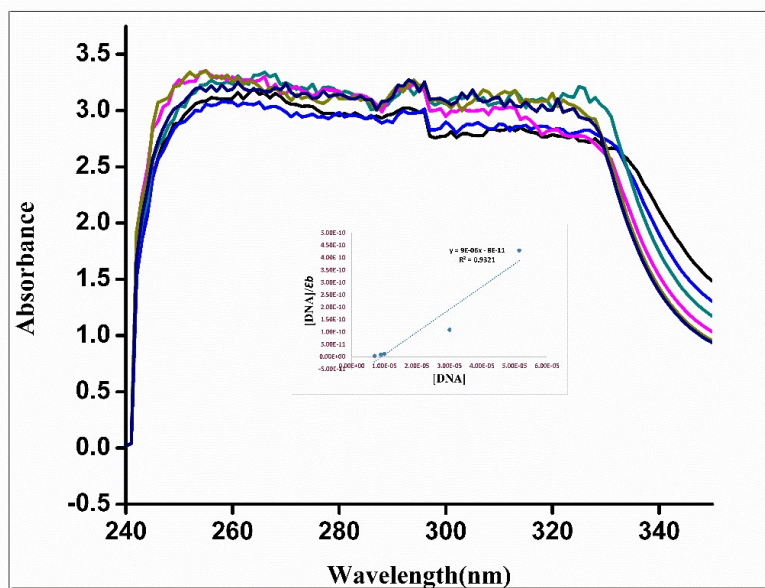

**Compound 20**

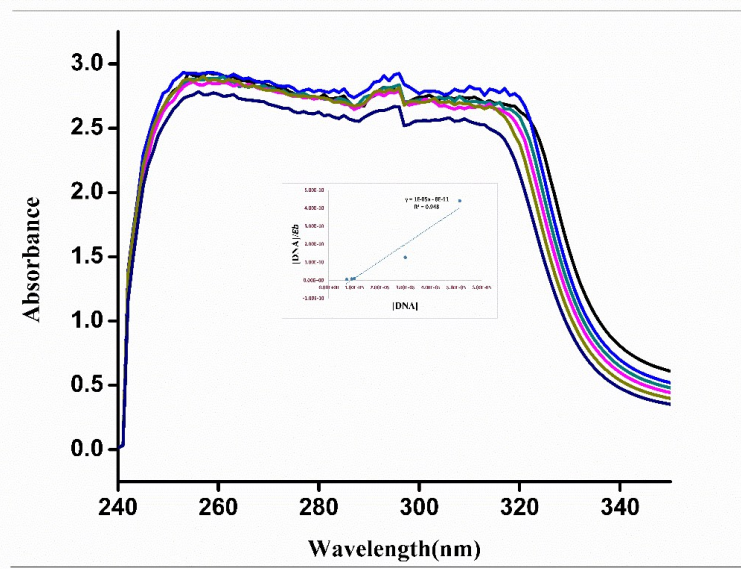

**Compound 22**

Fig. 1: Absorption spectra of 12,13,14,15,16,17,18,19,20 and 22 in the absence and presence of different Ct-DNA concentrations. Inset: plots of  $[DNA]/\epsilon b$  vs  $[DNA]$  for the absorption titration of Ct-DNA with compounds. The concentrations of DNA are 1)  $5.15 \times 10^{-5}$  2)  $3.0 \times 10^{-5}$  3)  $1.00 \times 10^{-5}$  4)  $0.9 \times 10^{-5}$  and 5)  $0.7 \times 10^{-5}$ .

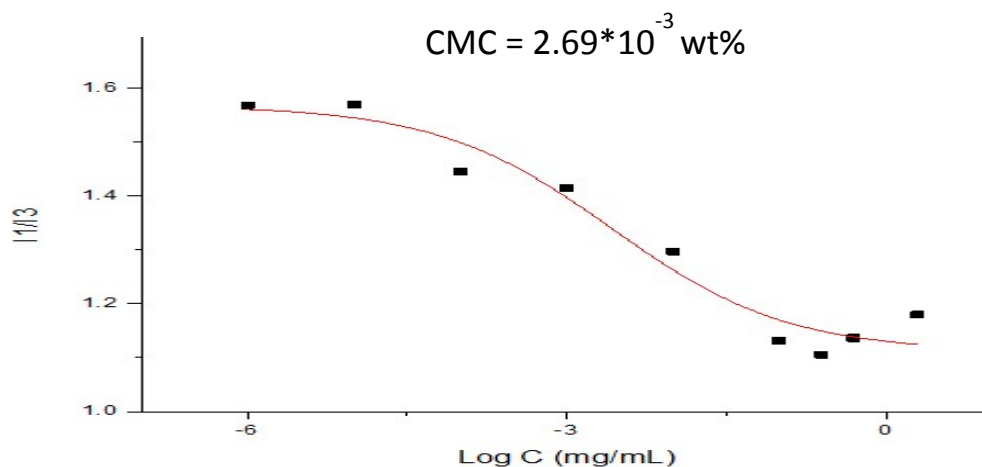

**Fig 3:- Critical Micelle Concentration by pyrene 1:3 method**

These were characterized by UV-Vis., FT-IR, Mass, NMR spectroscopy. The structural data is described in supplementary material.

### **3.1 1-[1-(morpholin-4-ylmethyl)-1H-indol-3-yl]-N-(4-nitrophenyl)methanimine (11)**

Yellowish creamish powder; yield: 72%; Melting point: 210-213<sup>0</sup>C, IR (cm<sup>-1</sup>): 1381.70 (-NO<sub>2</sub> sym), 1443.23 (-CH<sub>2</sub>- bending), 1736.61 (C=N strec.), 1033.61 (-CH<sub>2</sub>- ring strec.), 1590.32 (C=C skeleton), 3037.74 (CH aromatic stretching), 1092.88 (O-C-O), 3171.48 (N[CH<sub>2</sub>]<sub>3</sub>); <sup>1</sup>H NMR (300 MHz DMSO-d<sub>6</sub>): 7.2(s, 1H, =CH), 8.33 (s, 1H, -CH=N), 7.32(dd, 2H, aromatic),

7.91(d, 2H, aromatic), 7.11(d, 2H, aromatic), 8.20(d, 2H, aromatic), 4.91(s, 2H, >CH<sub>2</sub>), 2.51(t, 2H, >CH<sub>2</sub>), 3.62 (t, 2H, >CH<sub>2</sub>);ESI-MS (m/z) Calcd for C<sub>20</sub>H<sub>20</sub>N<sub>4</sub>O<sub>3</sub> [M+2Na+5H]<sup>+</sup>: 363.4, found: 365.0.

### 3.2 N-(4-bromophenyl)-1-[1-(morpholin-4-ylmethyl)-1H-indol-3-yl]methanimine (12)

Light yellowish creamish powder; yield: 69%; Melting point:170-173<sup>o</sup>C, IR (cm<sup>-1</sup>): 676.88 (C-Br), 1449.14 (-CH<sub>2</sub>- bending), 1648.15 (C=N strec.), 1004.19 (-CH<sub>2</sub>- ring strec.), 1522.21 (C=C skeleton), 3092.36 (CH aromatic stretching), 1106.76 (O-C-O), 3018.83 (N[CH<sub>2</sub>]<sub>3</sub>); <sup>1</sup>H NMR (300 MHz CHCl<sub>3</sub>-d<sub>6</sub>): 7.03(s,1H,=CH), 8.23 (s, 1H, -CH=N), 7.27(dd, 2H, aromatic), 7.89(d, 2H, aromatic), 7.21(d, 2H, aromatic), 8.11(d, 2H, aromatic), 4.82(s, 2H, >CH<sub>2</sub>), 2.62(t, 2H, >CH<sub>2</sub>), 3.57 (t, 2H, >CH<sub>2</sub>);ESI-MS (m/z) Calcd for C<sub>20</sub>H<sub>20</sub>BrN<sub>3</sub>O [M -6H]<sup>+</sup>: 397.3, found: 390.9.

### 3.3 N-(4-fluorophenyl)-1-[1-(morpholin-4-ylmethyl)-1H-indol-3-yl]methanimine (13)

Brown coloured powder; yield: 71%; Melting point:179-184<sup>o</sup>C, IR (cm<sup>-1</sup>): 1105.72 (C-F), 1446.65 (-CH<sub>2</sub>- bending), 1650.54 (C=N strec.), 1006.23 (-CH<sub>2</sub>- ring strec.), 1526.61 (C=C skeleton), 3015.48 (CH aromatic stretching), 1217.09 (O-C-O), 2867.71 (N[CH<sub>2</sub>]<sub>3</sub>); <sup>1</sup>H NMR (300 MHz CHCl<sub>3</sub>-d<sub>6</sub>): 7.17(s,1H,=CH), 8.43 (s, 1H, -CH=N), 7.44(dd, 2H, aromatic), 7.90(d, 2H, aromatic), 7.29(d, 2H, aromatic), 8.00(d, 2H, aromatic), 4.73(s, 2H, >CH<sub>2</sub>), 2.58(t, 2H, >CH<sub>2</sub>), 3.55 (t, 2H, >CH<sub>2</sub>);ESI-MS (m/z) Calcd for C<sub>20</sub>H<sub>20</sub>FN<sub>3</sub>O [M + Na-2H]<sup>+</sup>: 336.4, found: 357.0.

### 3.4 N-(2-methoxyphenyl)-1-[1-(morpholin-4-ylmethyl)-1H-indol-3-yl]methanimine (14)

Light yellowish cream powder; yield: 73%; Melting point:112-115<sup>o</sup>C, IR (cm<sup>-1</sup>): 1302.18 (C-OCH<sub>3</sub>), 1445.12 (-CH<sub>2</sub>- bending), 1647.89 (C=N strec.), 1003.72 (-CH<sub>2</sub>- ring strec.), 1525.10 (C=C skeleton), 3091.50 (CH aromatic stretching), 1103.93 (O-C-O), 3015.94(N[CH<sub>2</sub>]<sub>3</sub>); <sup>1</sup>H



NMR (300 MHz CHCl<sub>3</sub>-d<sub>6</sub>): 7.31(s,1H,=CH), 8.62(s, 1H, -CH=N), 3.89(s,3H,-OCH<sub>3</sub>), 7.63(dd, 2H, aromatic), 7.87(d, 2H, aromatic), 7.32(d, 2H, aromatic), 7.16(dd, 2H, aromatic), 4.89(s, 2H, >CH<sub>2</sub>), 3.28(t, 2H, >CH<sub>2</sub>), 4.43 (t, 2H, >CH<sub>2</sub>);ESI-MS (m/z) Calcd for C<sub>21</sub>H<sub>23</sub>N<sub>3</sub>O<sub>2</sub> [M +3K+4H]<sup>+</sup>: 348.4, found: 352.0.

### **3.5 N-(2-methylphenyl)-1-[1-(morpholin-4-ylmethyl)-1H-indol-3-yl]methanimine (15)**

Orange coloured cream powder; yield: 76%; Melting point:102-105<sup>0</sup>C, IR (cm<sup>-1</sup>): 2866.94 (C-CH<sub>3</sub>), 1446.52 (-CH<sub>2</sub>- bending), 1650.23 (C=N strec.), 1005.43 (-CH<sub>2</sub>- ring strec.), 1526.20 (C=C skeleton), 3015.79 (CH aromatic stretching), 1217.42 (O-C-O), 2866.94(N[CH<sub>2</sub>]<sub>3</sub>); <sup>1</sup>H NMR (300 MHz CHCl<sub>3</sub>-d<sub>6</sub>): 7.32(s,1H,=CH), 8.26(s, 1H, -CH=N), 2.28(s,3H,-CH<sub>3</sub>), 7.42(dd, 2H, aromatic), 7.91(d, 2H, aromatic), 7.21(d, 2H, aromatic), 7.27(dd, 2H, aromatic), 4.73(s, 2H, >CH<sub>2</sub>), 3.28(t, 2H, >CH<sub>2</sub>), 4.35 (t, 2H, >CH<sub>2</sub>);ESI-MS (m/z) Calcd for C<sub>21</sub>H<sub>23</sub>N<sub>3</sub>O [M + H]<sup>+</sup>: 332.4, found: 332.1.

### **3.6 N-(4-methoxyphenyl)-1-[1-(morpholin-4-ylmethyl)-1H-indol-3-yl]methanimine (16)**

Dark cream coloured powder; yield: 70%; Melting point:125-129<sup>0</sup>C, IR (cm<sup>-1</sup>): 1304.57 (C-OCH<sub>3</sub>), 1447.72 (-CH<sub>2</sub>- bending), 1651.38 (C=N strec.), 1007.55 (-CH<sub>2</sub>- ring strec.), 1525.20 (C=C skeleton), 3015.54 (CH aromatic stretching), 1217.56 (O-C-O), 3093.58 (N[CH<sub>2</sub>]<sub>3</sub>); <sup>1</sup>H NMR (300 MHz CHCl<sub>3</sub>-d<sub>6</sub>): 7.00(s,1H,=CH), 3.71(s,3H,-OCH<sub>3</sub>), 8.28(s, 1H, -CH=N), 7.38(dd, 2H, aromatic), 7.68(d, 2H, aromatic), 7.29(d, 2H, aromatic), 7.9(d, 2H, aromatic), 4.66(s, 2H, >CH<sub>2</sub>), 3.18(t, 2H, >CH<sub>2</sub>), 2.92(t, 2H, >CH<sub>2</sub>);ESI-MS (m/z) Calcd for C<sub>21</sub>H<sub>23</sub>N<sub>3</sub>O<sub>2</sub> [M +3K+Na+5H]<sup>+</sup>:348.4, found: 353.0.

### **3.7 N-(4-methylphenyl)-1-[1-(morpholin-4-ylmethyl)-1H-indol-3-yl]methanimine (17)**

Orange coloured powder; yield: 61%; Melting point:161-164<sup>0</sup>C, IR (cm<sup>-1</sup>): 2864.32 (C-CH<sub>3</sub>), 1445.57 (-CH<sub>2</sub>- bending), 1649.22 (C=N strec.), 1027.93 (-CH<sub>2</sub>- ring strec.), 1518.65

(C=C skeleton), 3016.48 (CH aromatic stretching), 1217.88 (O-C-O), 2968.13 (N[CH<sub>2</sub>]<sub>3</sub>); <sup>1</sup>H NMR (300 MHz CHCl<sub>3</sub>-d<sub>6</sub>): 7.21(s,1H,=CH), 2.41(s,3H,-CH<sub>3</sub>), 8.11(s, 1H, -CH=N), 7.46(dd, 2H, aromatic), 7.78(d, 2H, aromatic), 7.41(d, 2H, aromatic), 7.90(d, 2H, aromatic), 4.46(s, 2H, >CH<sub>2</sub>), 2.56(t, 2H, >CH<sub>2</sub>), 2.77(t, 2H, >CH<sub>2</sub>);ESI-MS (m/z) Calcd for C<sub>21</sub>H<sub>23</sub>N<sub>3</sub>O [M +K+Na+5H]<sup>+</sup>:332.4, found: 398.1.

### 3.8 N-(4-chlorophenyl)-1-[1-(morpholin-4-ylmethyl)-1H-indol-3-yl]methanimine (18)

Dark yellow coloured powder; yield: 74%; Melting point:120-123°C, IR (cm<sup>-1</sup>): 745.22 (C-Cl), 1449.05 (-CH<sub>2</sub>- bending), 1646.57 (C=N strec.), 1005.73 (-CH<sub>2</sub>- ring strec.), 1525.02 (C=C skeleton), 3016.48 (CH aromatic stretching), 1217.90 (O-C-O), 2967.84 (N[CH<sub>2</sub>]<sub>3</sub>); <sup>1</sup>H NMR (300 MHz CHCl<sub>3</sub>-d<sub>6</sub>): 7.35(s,1H,=CH), 8.19(s, 1H, -CH=N), 7.62(dd, 2H, aromatic), 7.96(d, 2H, aromatic), 7.22(d, 2H, aromatic), 7.96(d, 2H, aromatic), 5.00(s, 2H, >CH<sub>2</sub>), 2.44(t, 2H, >CH<sub>2</sub>), 4.08(t, 2H, >CH<sub>2</sub>); ESI-MS (m/z) Calcd for C<sub>20</sub>H<sub>20</sub>ClN<sub>3</sub>O [M +K+Na+3H]<sup>+</sup>:352.86, found: 354.0.

### 3.9 1-{1-[(4-methylpiperazin-1-yl)methyl]-1H-indol-3-yl}-N-(4nitrophenyl)methanimine (19)

Dark yellowish creamish powder; yield: 65%; Melting point:212-220°C, IR (cm<sup>-1</sup>): 1371.92 (-NO<sub>2</sub> sym), 1450.50 (-CH<sub>2</sub>- bending), 1643.55 (C=N strec.), 1006.21 (-CH<sub>2</sub>- ring strec.), 1519.67 (C=C skeleton), 3021.39 (CH aromatic stretching), 2944.51 (N[CH<sub>2</sub>]<sub>3</sub>); <sup>1</sup>H NMR (300 MHz DMSO-d<sub>6</sub>): 7.31(s,1H,=CH), 8.39 (s, 1H, -CH=N), 7.42(dd, 2H, aromatic), 8.00(d, 2H, aromatic), 7.11(d, 2H, aromatic), 8.10(d, 2H, aromatic), 4.91(s, 2H, >CH<sub>2</sub>), 2.62(t, 2H, >CH<sub>2</sub>), 4.12 (t, 2H, >CH<sub>2</sub>);ESI-MS (m/z) Calcd for C<sub>21</sub>H<sub>23</sub>N<sub>5</sub>O<sub>2</sub> [M +2K+Na-4H]<sup>+</sup>:362.4, found: 459.1.

### 3.10 N-(4-fluorophenyl)-1-{1-[(4-methylpiperazin-1-yl)methyl]-1H-indol-3-yl}methanimine (20)

Light yellow coloured powder; yield: 75%; Melting point:186-187<sup>o</sup>C, IR (cm<sup>-1</sup>): 1093.83 (C-F), 1450.36 (-CH<sub>2</sub>- bending), 1647.71 (C=N strec.), 1032.10 (-CH<sub>2</sub>- ring strec.), 1505.54 (C=C skeleton), 3016.34 (CH aromatic stretching), 2968.95 (N[CH<sub>2</sub>]<sub>3</sub>); <sup>1</sup>H NMR (300 MHz DMSO-d<sub>6</sub>): 7.22s,1H,=CH), 8.31 (s, 1H, -CH=N), 7.43(dd, 2H, aromatic), 8.12(d, 2H, aromatic), 7.31(d, 2H, aromatic), 8.24(d, 2H, aromatic), 4.72(s, 2H, >CH<sub>2</sub>), 2.74(t, 2H, >CH<sub>2</sub>), 3.61 (t, 2H, >CH<sub>2</sub>); ESI-MS (m/z) Calcd for C<sub>21</sub>H<sub>23</sub>FN<sub>4</sub> [M +7H]<sup>+</sup>:349.5, found: 356.0.

### **3.11 N-(2-methoxyphenyl)-1-{1-[(4-methylpiperazin-1-yl)methyl]-1H-indol-3-yl}methanimine (21)**

Dark yellow coloured powder; yield: 62%; Melting point:108-110<sup>o</sup>C, IR (cm<sup>-1</sup>): 1366.43 (C-OCH<sub>3</sub>), 1445.02 (-CH<sub>2</sub>- bending), 1656.32 (C=N strec.), 1010.70 (-CH<sub>2</sub>- ring strec.), 1527.29 (C=C skeleton), 3015.24 (CH aromatic stretching), 2951.62 (N[CH<sub>2</sub>]<sub>3</sub>); <sup>1</sup>H NMR (300 MHz CHCl<sub>3</sub>-d<sub>6</sub>): 7.25(s,1H,=CH), 8.42(s, 1H, -CH=N), 3.81(s,3H,-OCH<sub>3</sub>), 7.53(dd, 2H, aromatic), 7.91(d, 2H, aromatic), 7.29(d, 2H, aromatic), 7.11(dd, 2H, aromatic), 4.89(s, 2H, >CH<sub>2</sub>), 3.28(t, 2H, >CH<sub>2</sub>), 3.45 (t, 2H, >CH<sub>2</sub>);ESI-MS (m/z) Calcd for C<sub>22</sub>H<sub>26</sub>N<sub>4</sub>O [M -4H]<sup>+</sup>:361.5, found: 356.0

### **3.12 N-(4-methylphenyl)-1-{1-[(4-methylpiperazin-1-yl)methyl]-1H-indol-3-yl}methanimine (22)**

Whitish coloured powder; yield: 60%; Melting point:157-159<sup>o</sup>C, IR (cm<sup>-1</sup>): 2942.18 (C-CH<sub>3</sub>), 1450.93 (-CH<sub>2</sub>- bending), 1655.04 (C=N strec.), 1011.20 (-CH<sub>2</sub>- ring strec.), 1519.55 (C=C skeleton), 3092.96 (CH aromatic stretching), 3017.74 (N[CH<sub>2</sub>]<sub>3</sub>); <sup>1</sup>H NMR (300 MHz DMSO-d<sub>6</sub>): 7.21(s,1H,=CH), 2.32(s,3H,-CH<sub>3</sub>), 8.11(s, 1H, -CH=N), 7.16(dd, 2H, aromatic),

7.82(d, 2H, aromatic), 7.25(d, 2H, aromatic), 7.80(d, 2H, aromatic), 4.36(s, 2H, >CH<sub>2</sub>), 2.56(t, 2H, >CH<sub>2</sub>), 2.77(t, 2H, >CH<sub>2</sub>); ESI-MS (m/z) Calcd for C<sub>22</sub>H<sub>26</sub>N<sub>4</sub> [M +Na+2H]<sup>+</sup>:345.5, found: 347.0.

### 3.13 N-(4-chlorophenyl)-1-{1-[(4-methylpiperazin-1-yl)methyl]-1H-indol-3-yl}methanimine (23)

Yellow coloured powder; yield: 67%; Melting point:136-138°C, IR (cm<sup>-1</sup>): 745.22 (C-Cl), 1446.92 (-CH<sub>2</sub>- bending), 1642.52 (C=N strec.), 1034.60 (-CH<sub>2</sub>- ring strec.), 1591.44 (C=C skeleton), 3016.02 (CH aromatic stretching), 2922.00 (N[CH<sub>2</sub>]<sub>3</sub>); <sup>1</sup>H NMR (300 MHz CHCl<sub>3</sub>-d<sub>6</sub>): 7.51(s,1H,=CH), 8.45(s, 1H, -CH=N), 7.55(dd, 2H, aromatic), 7.78(d, 2H, aromatic), 7.32(d, 2H, aromatic), 7.85(d, 2H, aromatic), 5.33(s, 2H, >CH<sub>2</sub>), 2.33(t, 2H, >CH<sub>2</sub>), 4.17(t, 2H, >CH<sub>2</sub>);ESI-MS (m/z) Calcd for C<sub>21</sub>H<sub>23</sub>ClN<sub>4</sub> [M +K-H]<sup>+</sup>:366.0, found: 405.1.

Docking studies

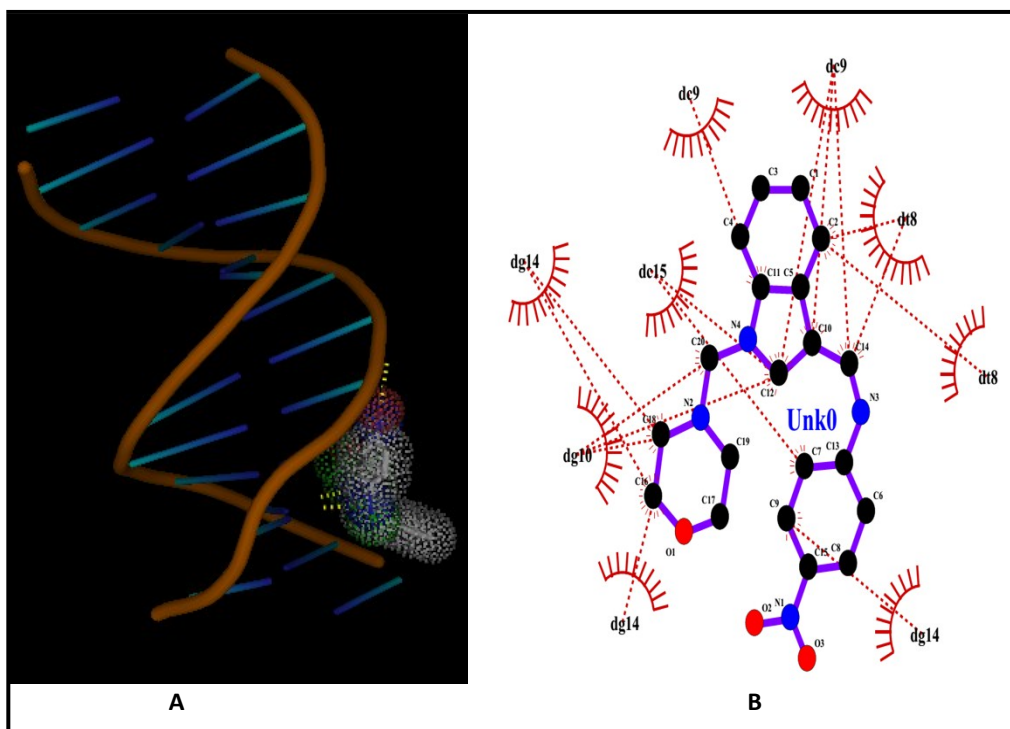





**Fig. SI 3.** Docking poses of **21** with DNA (a) 3D-pose depicting vicinity and hydrogen bonding and (b) 2D-pose showing residues involved in hydrophobic interactions.

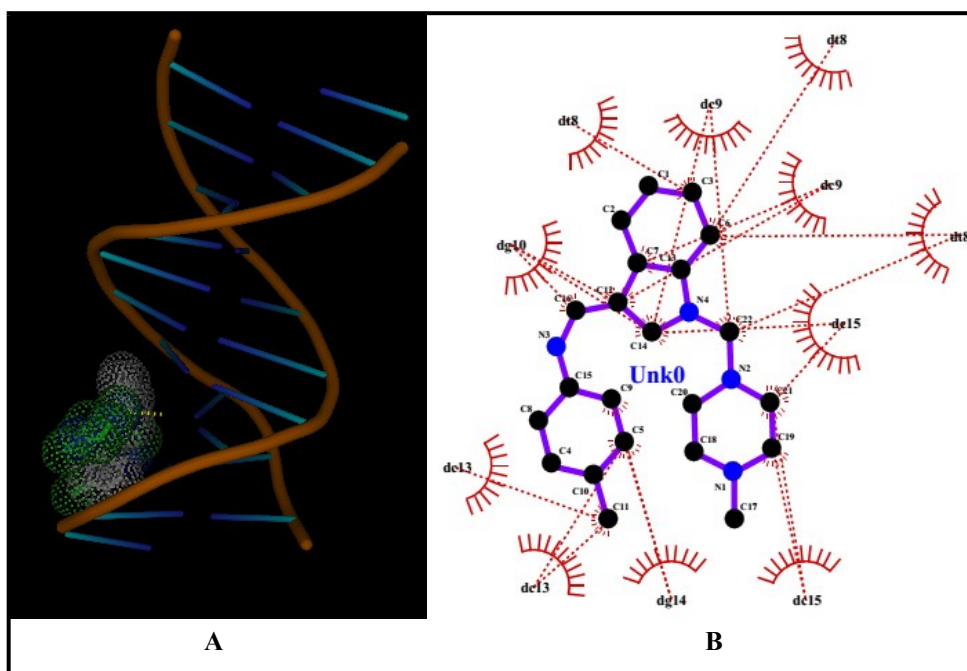

**Fig. SI 4.** Docking poses of **22** with DNA (a) 3D-pose depicting vicinity and hydrogen bonding and (b) 2D-pose showing residues involved in hydrophobic interactions.

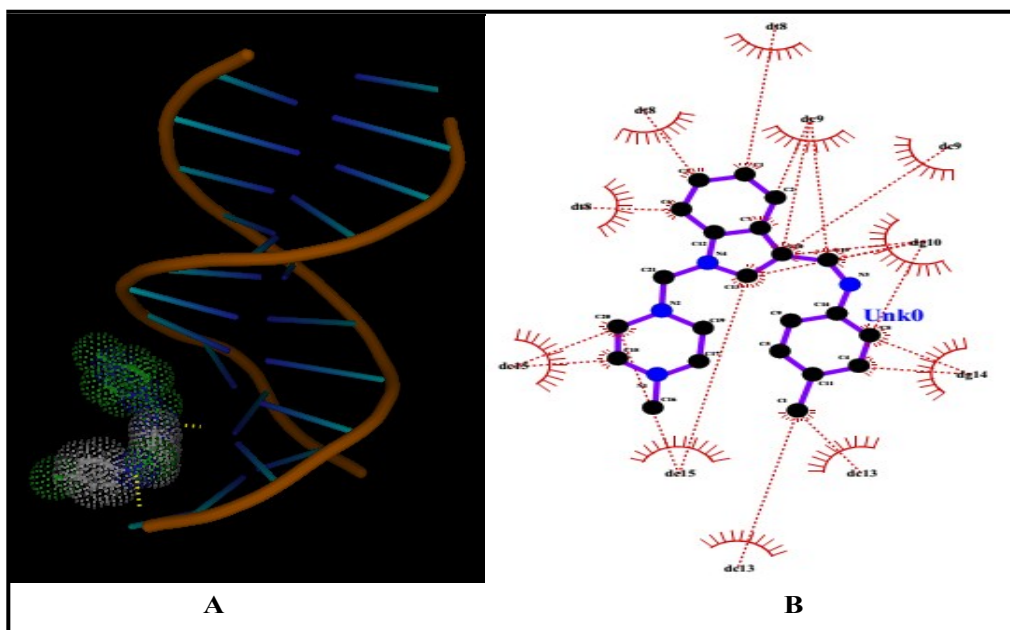

**Fig. SI 5.** Docking poses of **23** with DNA (a) 3D-pose depicting vicinity and hydrogen bonding and (b) 2D-pose showing residues involved in hydrophobic interactions.
